# Supplementary material
Source: PubMed Central journal article supplement (PMC11328943)
Supplement: NIHMS2013302-supplement-Supplement.pdf [file NIHMS2013302-supplement-Supplement.pdf]

## Supplement to “Treatment of opioid use disorder in Ukraine during the first year of the Russia-Ukraine war: Lessons learned from the crisis”

Authors: Olga Morozova, Iryna Ivanchuk, Olga Gvozdetska, Olena Nesterova, Pavlo Skala, Ihor Kuzin, Kostyantyn Dumchev

### 1. Governmental statistics on the number of MOUD patients and dropout rates in governmental clinics.

Table S1 provides information on MOUD patient census in governmental clinics as of January 1 of each year between 2010 – 2023 along with the respective percentage increase of the number of patients each year.

**Table S1.** Annual dynamics of the number of MOUD patients in governmental clinics.

| Year   | MOUD patient census as of the end of the year | Proportion change during the year |
|--------|-----------------------------------------------|-----------------------------------|
| 2009   | 5,078                                         |                                   |
| 2010   | 6,025                                         | 19%                               |
| 2011   | 6,632                                         | 10%                               |
| 2012   | 7,339                                         | 11%                               |
| 2013   | 8,614                                         | 17%                               |
| 2014*  | 8,407                                         | -2%                               |
| 2015   | 8,512                                         | 1%                                |
| 2016   | 9,214                                         | 8%                                |
| 2017   | 10,189                                        | 11%                               |
| 2018   | 11,385                                        | 12%                               |
| 2019   | 12,411                                        | 9%                                |
| 2020** | 14,868                                        | 20%                               |
| 2021   | 17,043                                        | 15%                               |
| 2022   | 19,919                                        | 17%                               |

\* Annexation of Crimea and occupation of parts of Donetsk and Luhansk regions by Russia

\*\* COVID-19 pandemic: relaxation of regulations regarding take-home dosing

Table S2 shows data on monthly MOUD all-cause dropout rates in governmental clinics and dropout rates for reasons other than transfer to a different site or relocation. Approximate dropout rates are calculated as follows:

$$d_t = \frac{k_t}{N_{t-1}} * 100\%$$

where  $d_t$  is a dropout rate in month  $t$ ,  $k_t$  is the number of patients who dropped out during month  $t$ , and  $N_{t-1}$  is the number of patients (census) as of the end of the month  $t-1$ .

**Table S2.** Monthly MOUD patient dropout rates in governmental clinics.

| Month t    | Patient census at the end of month t-1 | Total number of patients who dropped out during month t | All-cause dropout rate in month t | Number of patients who dropped out during month t for reasons other than transfer or relocation | “Non-movement” dropout rate in month t |
|------------|----------------------------------------|---------------------------------------------------------|-----------------------------------|-------------------------------------------------------------------------------------------------|----------------------------------------|
| Jan, 2021  | 14,868                                 | 332                                                     | 2.2%                              | 207                                                                                             | 1.4%                                   |
| Feb, 2021  | 15,097                                 | 514                                                     | 3.4%                              | 187                                                                                             | 1.2%                                   |
| Mar, 2021  | 15,270                                 | 361                                                     | 2.4%                              | 211                                                                                             | 1.4%                                   |
| Apr, 2021  | 15,482                                 | 254                                                     | 1.6%                              | 187                                                                                             | 1.2%                                   |
| May, 2021  | 15,686                                 | 320                                                     | 2.0%                              | 199                                                                                             | 1.3%                                   |
| Jun, 2021  | 15,833                                 | 360                                                     | 2.3%                              | 220                                                                                             | 1.4%                                   |
| Jul, 2021  | 16,011                                 | 380                                                     | 2.4%                              | 240                                                                                             | 1.5%                                   |
| Aug, 2021  | 16,190                                 | 390                                                     | 2.4%                              | 222                                                                                             | 1.4%                                   |
| Sept, 2021 | 16,303                                 | 383                                                     | 2.3%                              | 248                                                                                             | 1.5%                                   |
| Oct, 2021  | 16,478                                 | 387                                                     | 2.3%                              | 223                                                                                             | 1.4%                                   |
| Nov, 2021  | 16,617                                 | 334                                                     | 2.0%                              | 256                                                                                             | 1.5%                                   |
| Dec, 2021  | 16,843                                 | 286                                                     | 1.7%                              | 201                                                                                             | 1.2%                                   |
| Jan, 2022  | 17,043                                 | 375                                                     | 2.2%                              | 257                                                                                             | 1.5%                                   |
| Feb, 2022  | 17,210                                 | 321                                                     | 1.9%                              | 214                                                                                             | 1.2%                                   |
| Mar, 2022  | 16,374                                 | 882                                                     | 5.4%                              | 253                                                                                             | 1.5%                                   |
| Apr, 2022  | 17,510                                 | 640                                                     | 3.7%                              | 331                                                                                             | 1.9%                                   |
| May, 2022  | 17,844                                 | 818                                                     | 4.6%                              | 343                                                                                             | 1.9%                                   |
| Jun, 2022  | 18,506                                 | 632                                                     | 3.4%                              | 174                                                                                             | 0.9%                                   |
| Jul, 2022  | 19,206                                 | 697                                                     | 3.6%                              | 534                                                                                             | 2.8%                                   |
| Aug, 2022  | 19,342                                 | 505                                                     | 2.6%                              | 361                                                                                             | 1.9%                                   |
| Sept, 2022 | 18,997                                 | 590                                                     | 3.1%                              | 331                                                                                             | 1.7%                                   |
| Oct, 2022  | 19,419                                 | 442                                                     | 2.3%                              | 326                                                                                             | 1.7%                                   |
| Nov, 2022  | 19,536                                 | 494                                                     | 2.5%                              | 320                                                                                             | 1.6%                                   |
| Dec, 2022  | 19,698                                 | 626                                                     | 3.2%                              | 399                                                                                             | 2.0%                                   |
| Jan, 2023  | 19,919                                 | 447                                                     | 2.2%                              | 337                                                                                             | 1.7%                                   |

## 2. MOUD patients in private clinics.

Private clinics licensed to provide MOUD are not required to submit reporting to the Public Health Center of the Ministry of Health of Ukraine (PHC). For this reason, reporting is inconsistent and does not follow any specific methodology. For example, it is unknown whether private clinics maintain any patient registries that would allow them counting individual patients as opposed to visits or prescriptions given out. Criteria for someone to be counted as a new or current patient or as a dropout are also unclear.

Tables S3 and S4 provide summary data that were reported by private clinics to the PHC between February 1, 2022 – February 1, 2023. Given the registration and reporting systems limitations, data provided below should be interpreted with caution.

**Table S3.** Monthly dynamics of the number of private clinics reporting data to the PHC and the number of MOUD patients in these clinics (patient census as of the first day of each month).

| Reporting date    | Number of private clinics that submitted reporting | MOUD patient census (number of patients) in these clinics |
|-------------------|----------------------------------------------------|-----------------------------------------------------------|
| February 1, 2022  | 19                                                 | 3,121                                                     |
| March 1, 2022     | 0                                                  | NA                                                        |
| April 1, 2022     | 0                                                  | NA                                                        |
| May 1, 2022       | 0                                                  | NA                                                        |
| June 1, 2022      | 13                                                 | 5,818                                                     |
| July 1, 2022      | 15                                                 | 5,182                                                     |
| August 1,2022     | 0                                                  | NA                                                        |
| September 1, 2022 | 17                                                 | 5,016                                                     |
| October 1, 2022   | 16                                                 | 5,363                                                     |
| November 1 ,2022  | 17                                                 | 5,532                                                     |
| December 1, 2022  | 22                                                 | 7,513                                                     |
| January 1, 2023   | 26                                                 | 8,604                                                     |
| February 1, 2023  | 27                                                 | 8,960                                                     |

**Table S4.** Monthly dynamics of the number of MOUD patients (census) among 8 clinics consistently reporting data to the PHC (excluding March, April, and May 2022 reporting).

| Reporting date    | MOUD patient census (number of patients) in 8 clinics reporting consistently |
|-------------------|------------------------------------------------------------------------------|
| February 1, 2022  | 1,384                                                                        |
| March 1, 2022     | NA                                                                           |
| April 1, 2022     | NA                                                                           |
| May 1, 2022       | NA                                                                           |
| June 1, 2022      | 2,873                                                                        |
| July 1, 2022      | 2,857                                                                        |
| August 1,2022     | 2,857                                                                        |
| September 1, 2022 | 3,181                                                                        |
| October 1, 2022   | 3,167                                                                        |
| November 1 ,2022  | 3,308                                                                        |
| December 1, 2022  | 3,349                                                                        |
| January 1, 2023   | 3,281                                                                        |
| February 1, 2023  | 3,272                                                                        |

### 3. MOUD patient survey methodology

Design: Cross-sectional survey.

Target population: Patients of governmental MOUD clinics.

Duration of data collection: June-July 2022.

Sample size: N=700, stratified by site proportionally to the total number of patients.

Sampling procedures: Random sampling was done by recruiting all patients visiting the clinics on randomly chosen days (patients come to the clinic once every ten days on average). Patients were enrolled in the survey after eligibility screening and signing of informed consent. Recruitment was continued until the target sample size was achieved.

Eligibility criteria: 1) MOUD patient at one of the participating clinics regardless of the duration of treatment; 2) over 18 years old; 3) was not internally displaced since the beginning of the war; 4) able to provide informed consent.

Interview type: Self-administered (with staff assistance if needed) computer-assisted interview (REDCap).

Questionnaire: Survey questionnaire included sections related to demographics, substance use history and risk behaviors, sexual risk behaviors, substance use and MOUD experiences before and after the war started, alcohol use disorder, depression, and anxiety screenings, and withdrawal symptoms.

IRB approval: IRB at the Ukrainian Institute on Public Health Policy approved the study.

Geography: Table S5.

**Table S5.** MOUD patient survey sample size by region.

| <b>Region</b>   | <b>Sample size (N)</b> |
|-----------------|------------------------|
| Rivne           | 30                     |
| Ivano-Frankivsk | 45                     |
| Lviv            | 55                     |
| Poltava         | 116                    |
| Vinnytsia       | 49                     |
| Kyryvi Rih      | 161                    |
| Mykolaiv        | 136                    |
| Odesa           | 108                    |
| <b>TOTAL</b>    | <b>700</b>             |

### 4. MOUD provider survey methodology

Design: Cross-sectional survey.

Target population: MOUD providers in governmental clinics, including physicians and site managers.

Duration of data collection: July-August 2022.

Sample size: N=143; no target sample size was specified, all providers for whom contact information was available were invited, and efforts were made to enroll as many participants as possible.

Recruitment procedures: Survey link was distributed via email and text messaging to all physicians included in the PHC mailing list (N=210), and via online chat platform (exclusive for MOUD physicians, N~150). Survey link dissemination was repeated weekly until survey termination on August 31, 2022.

Eligibility criteria: Medical doctors involved in MOUD provision (physicians or administrators) in Ukraine in 2022. Those who stopped working due to site closure or migration during the war were also eligible to participate in the survey.

Interview type: Self-administered online survey (Google forms).

Questionnaire: Survey questionnaire included questions related to the site characteristics, changes after the war started, main challenges and needs, as well as a set of knowledge, attitude and practice questions collected by the PHC for the purposes of the national MOUD program evaluation.

IRB approval: IRB at the Ukrainian Institute on Public Health Policy approved the study.

Geography: Table S6.

Specialization: Table S7.

**Table S6.** MOUD provider survey sample size by region.

| <b>Region</b>                        | <b>Sample size (N)</b> |
|--------------------------------------|------------------------|
| Cherkasy                             | 18                     |
| Chernihiv                            | 6                      |
| Chernivtsi                           | 1                      |
| Dnipro                               | 16                     |
| Donetsk                              | 5                      |
| Ivano-Frankivsk                      | 7                      |
| Kharkiv                              | 3                      |
| Kherson                              | 2                      |
| Khmelnyskyi                          | 2                      |
| Kropyvnytskyi<br>(Kirovohrad region) | 9                      |
| Kyiv city                            | 8                      |
| Luhansk                              | 1                      |
| Lviv                                 | 7                      |
| Mykolaiv                             | 12                     |
| Odesa                                | 5                      |
| Poltava                              | 11                     |
| Rivne                                | 4                      |
| Sumy                                 | 5                      |
| Ternopil                             | 1                      |
| Vinnytsia                            | 11                     |
| Volyn                                | 2                      |
| Zakarpattia                          | 1                      |
| Zaporizzhia                          | 3                      |
| Zhytomyr                             | 3                      |
| <b>TOTAL</b>                         | <b>143</b>             |

**Table S7.** MOUD provider survey sample size by specialization.

| <b>Specialization</b>                              | <b>Sample size (N)</b> |
|----------------------------------------------------|------------------------|
| Narcologist (addiction specialist) or psychiatrist | 113                    |
| Infectious disease specialist or phthisiatrist     | 8                      |
| Primary care doctor                                | 11                     |
| Other specialty                                    | 11                     |
| <b>TOTAL</b>                                       | <b>143</b>             |

## 5. Regional distribution of patient and provider survey responses

**Table S8.** Main changes in MOUD site operations post-war, based on the provider survey (N=143)

| Region          | Site closed | Site is working, number of patients increased | Site is working, number of patients decreased | No major changes | Other | TOTAL |
|-----------------|-------------|-----------------------------------------------|-----------------------------------------------|------------------|-------|-------|
| Cherkasy        |             | 9                                             |                                               | 9                |       | 18    |
| Chernihiv       |             | 5                                             |                                               | 1                |       | 6     |
| Dnipro          |             | 11                                            |                                               | 5                |       | 16    |
| Donetsk         | 1           |                                               | 3                                             |                  | 1     | 5     |
| Ivano-Frankivsk |             | 6                                             |                                               | 1                |       | 7     |
| Kharkiv         | 1           |                                               | 2                                             |                  |       | 3     |
| Kropyvnytskyi   |             | 7                                             | 1                                             | 1                |       | 9     |
| Kyiv City       |             | 7                                             |                                               | 1                |       | 8     |
| Lviv            |             | 5                                             |                                               | 2                |       | 7     |
| Mykolaiv        |             | 2                                             | 2                                             | 7                | 1     | 12    |
| Odesa           |             | 3                                             |                                               | 2                |       | 5     |
| Poltava         |             | 10                                            | 1                                             |                  |       | 11    |
| Rivne           |             | 4                                             |                                               |                  |       | 4     |
| Sumy            |             | 2                                             |                                               | 3                |       | 5     |
| Vinnitsia       |             | 8                                             |                                               | 3                |       | 11    |
| Zaporizhia      |             | 3                                             |                                               |                  |       | 3     |
| Zhytomyr        |             | 3                                             |                                               |                  |       | 3     |
| Sites with N<3  | 1           | 6                                             | 1                                             | 2                | 0     | 10    |
| TOTAL (N=143)   | 3           | 91                                            | 10                                            | 37               | 2     | 143   |

**Table S9.** Providers reporting that they transferred most patients to take-home dosing (N=143)

| Region          | Yes | No | TOTAL |
|-----------------|-----|----|-------|
| Cherkasy        | 10  | 8  | 18    |
| Chernihiv       | 3   | 3  | 6     |
| Dnipro          | 8   | 8  | 16    |
| Donetsk         | 5   | 0  | 5     |
| Ivano-Frankivsk | 5   | 2  | 7     |
| Kharkiv         | 2   | 1  | 3     |
| Kropyvnytskyi   | 7   | 2  | 9     |
| Kyiv City       | 6   | 2  | 8     |
| Lviv            | 4   | 3  | 7     |
| Mykolaiv        | 8   | 4  | 12    |
| Odesa           | 3   | 2  | 5     |
| Poltava         | 10  | 1  | 11    |
| Rivne           | 2   | 2  | 4     |

|                |    |    |     |
|----------------|----|----|-----|
| Sumy           | 3  | 2  | 5   |
| Vinnytsia      | 10 | 1  | 11  |
| Zaporizzhia    | 3  | 0  | 3   |
| Zhytomyr       | 2  | 1  | 3   |
| Sites with N<3 | 6  | 4  | 10  |
| TOTAL          | 97 | 46 | 143 |

**Table S10.** Proportion of the patient survey respondents who reported receiving take-home MOUD medications for 1-10 days and for 11-30 days among patients who receive take-home or prescription dosing (N=663)

| Region                 | % receiving MOUD for 1-10 days | % receiving MOUD for 11-30 days |
|------------------------|--------------------------------|---------------------------------|
| Rivne (N=29)           | 100.0%                         | 0.0%                            |
| Ivano-Frankivsk (N=42) | 100.0%                         | 0.0%                            |
| Lviv (N=54)            | 100.0%                         | 0.0%                            |
| Poltava (N=106)        | 6.6%                           | 93.4%                           |
| Vinnytsia (N=44)       | 95.5%                          | 4.5%                            |
| Kyryvi Rih (N=149)     | 3.4%                           | 96.6%                           |
| Mykolaiv (N=133)       | 12.0%                          | 88.0%                           |
| Odesa (N=106)          | 20.8%                          | 79.2%                           |
| TOTAL (N=663)          | 32.7%                          | 67.3%                           |

**Table S11.** MOUD dosing at the time of the survey, dosing changes since the beginning of the war, satisfaction with current dosing, and self-administration of higher dosing based on the patient survey (N=700)

| Region                 | % with low current MOUD dose* | Dose: No change | Dose: Increased | Dose: Decreased | Would like to increase the dose | Took higher dose than prescribed in the last 30 days |
|------------------------|-------------------------------|-----------------|-----------------|-----------------|---------------------------------|------------------------------------------------------|
| Rivne (N=30)           | 20.0%                         | 90.0%           | 3.3%            | 6.7%            | 63.3%                           | 30.0%                                                |
| Ivano-Frankivsk (N=45) | 26.7%                         | 88.9%           | 4.4%            | 6.7%            | 48.9%                           | 31.1%                                                |
| Lviv (N=55)            | 25.5%                         | 69.1%           | 16.4%           | 14.5%           | 41.8%                           | 29.1%                                                |
| Poltava (N=116)        | 16.4%                         | 19.0%           | 1.7%            | 79.3%           | 61.2%                           | 2.6%                                                 |
| Vinnytsia (N=49)       | 22.4%                         | 77.6%           | 16.3%           | 6.1%            | 59.2%                           | 22.4%                                                |
| Kyryvi Rih (N=161)     | 8.1%                          | 95.7%           | 1.9%            | 2.5%            | 6.8%                            | 3.1%                                                 |
| Mykolaiv (N=136)       | 19.1%                         | 97.8%           | 2.2%            | 0.0%            | 28.7%                           | 33.1%                                                |
| Odesa (N=108)          | 6.5%                          | 65.7%           | 2.8%            | 31.5%           | 52.8%                           | 48.1%                                                |
| TOTAL (N=700)          | 15.4%                         | 74.7%           | 4.4%            | 20.9%           | 38.7%                           | 22.1%                                                |

\* less of equal to 60 mg for methadone and less or equal to 8mg for buprenorphine

**Table S12.** Providers reporting MOUD dosing reduction due to risks related to medication supply (N=143)

| Region          | Yes | No  | TOTAL |
|-----------------|-----|-----|-------|
| Cherkasy        | 8   | 10  | 18    |
| Chernihiv       | 0   | 6   | 6     |
| Dnipro          | 4   | 12  | 16    |
| Donetsk         | 1   | 4   | 5     |
| Ivano-Frankivsk | 0   | 7   | 7     |
| Kharkiv         | 2   | 1   | 3     |
| Kropyvnytskyi   | 0   | 9   | 9     |
| Kyiv City       | 6   | 2   | 8     |
| Lviv            | 1   | 6   | 7     |
| Mykolaiv        | 2   | 10  | 12    |
| Odesa           | 2   | 3   | 5     |
| Poltava         | 6   | 5   | 11    |
| Rivne           | 0   | 4   | 4     |
| Sumy            | 2   | 3   | 5     |
| Vinnytsia       | 0   | 11  | 11    |
| Zaporizhia      | 0   | 3   | 3     |
| Zhytomyr        | 0   | 3   | 3     |
| Sites with N<3  | 1   | 9   | 10    |
| TOTAL           | 35  | 108 | 143   |



**Table S13.** Regional distribution of the proportion of MOUD patients reporting illicit drug use in the 30 days before the survey and in the 30 days before the start of the war.

| Region                 | Cannabis                                    |                                          |         | Illicit opioids                             |                                          |         | Stimulants                                  |                                          |         | Tranquilizers, antihistamines, and hypnotics |                                          |         |
|------------------------|---------------------------------------------|------------------------------------------|---------|---------------------------------------------|------------------------------------------|---------|---------------------------------------------|------------------------------------------|---------|----------------------------------------------|------------------------------------------|---------|
|                        | % who used in the 30 days before the survey | % who used in the 30 days before the war | p-value | % who used in the 30 days before the survey | % who used in the 30 days before the war | p-value | % who used in the 30 days before the survey | % who used in the 30 days before the war | p-value | % who used in the 30 days before the survey  | % who used in the 30 days before the war | p-value |
| Rivne (N=30)           | 23.3%                                       | 23.3%                                    | 1.000   | 30.0%                                       | 30.0%                                    | 1.000   | 33.3%                                       | 30.0%                                    | 1.000   | 60.0%                                        | 63.3%                                    | 1.000   |
| Ivano-Frankivsk (N=45) | 26.7%                                       | 26.7%                                    | 1.000   | 31.1%                                       | 42.2%                                    | 0.267   | 24.4%                                       | 20.0%                                    | 0.617   | 51.1%                                        | 40.0%                                    | 0.074   |
| Lviv (N=55)            | 23.6%                                       | 29.1%                                    | 0.450   | 34.5%                                       | 34.5%                                    | 1.000   | 16.4%                                       | 18.2%                                    | 1.000   | 36.4%                                        | 36.4%                                    | 1.000   |
| Poltava (N=116)        | 13.8%                                       | 12.9%                                    | 1.000   | 6.0%                                        | 1.7%                                     | 0.131   | 1.7%                                        | 1.7%                                     | 1.000   | 10.3%                                        | 6.9%                                     | 0.289   |
| Vinnytsia (N=49)       | 51.0%                                       | 44.9%                                    | 0.450   | 18.4%                                       | 14.3%                                    | 0.617   | 8.2%                                        | 14.3%                                    | 0.505   | 46.9%                                        | 44.9%                                    | 1.000   |
| Kyryvi Rih (N=161)     | 15.5%                                       | 18.0%                                    | 0.343   | 9.3%                                        | 9.9%                                     | 1.000   | 11.8%                                       | 10.6%                                    | 0.617   | 7.5%                                         | 7.5%                                     | 1.000   |
| Mykolaiv (N=136)       | 25.7%                                       | 28.7%                                    | 0.387   | 14.7%                                       | 12.5%                                    | 0.505   | 2.2%                                        | 2.2%                                     | 1.000   | 25.0%                                        | 24.3%                                    | 1.000   |
| Odesa (N=108)          | 64.8%                                       | 71.3%                                    | 0.169   | 24.1%                                       | 50.0%                                    | <0.001  | 9.3%                                        | 11.1%                                    | 0.752   | 81.5%                                        | 77.8%                                    | 0.480   |
| TOTAL (N=700)          | 29.0%                                       | 31.0%                                    | 0.104   | 17.0%                                       | 20.4%                                    | 0.006   | 9.7%                                        | 9.9%                                     | 0.869   | 32.9%                                        | 30.9%                                    | 0.066   |

\* p-value for McNemar's test

## 6. Regional changes in daily supervised dosing based on governmental reporting.

Figure S1 shows the dynamics of the proportion of patients receiving MOUD daily in a clinic under direct supervision of medical staff across Ukrainian regions based on routine governmental clinics reporting. Snapshots are provided as of February 1, April 1, August 1, 2022, and as of February 1, 2023.

February 1, 2022; Country average: 15.1%

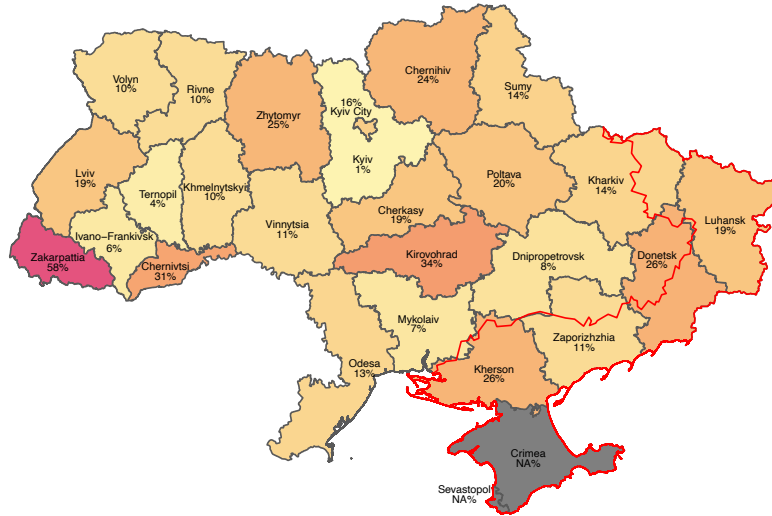

April 1, 2022; Country average: 5.6%

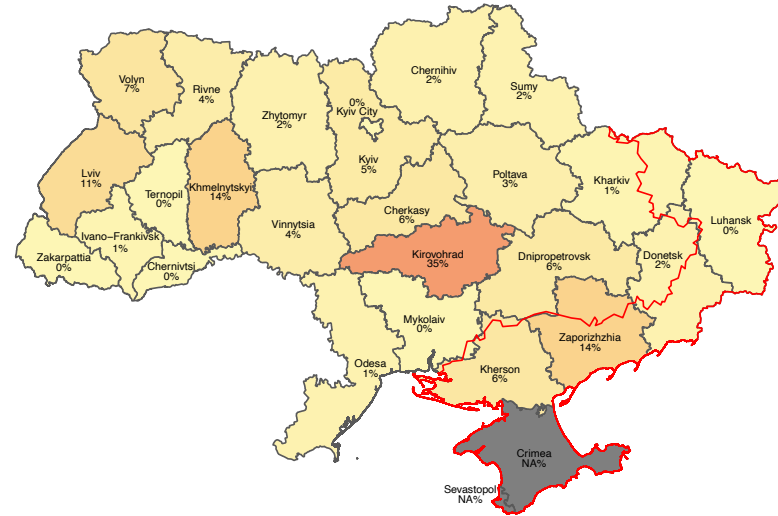

August 1, 2022; Country average: 8.8%

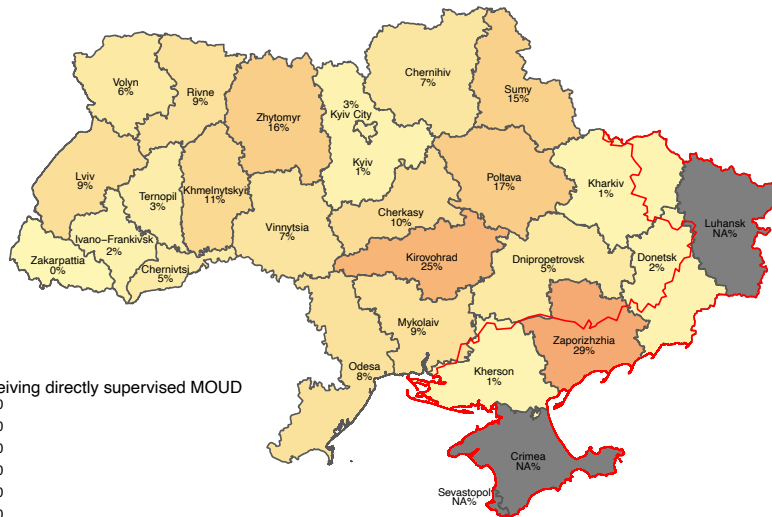

February 1, 2023; Country average: 9.4%

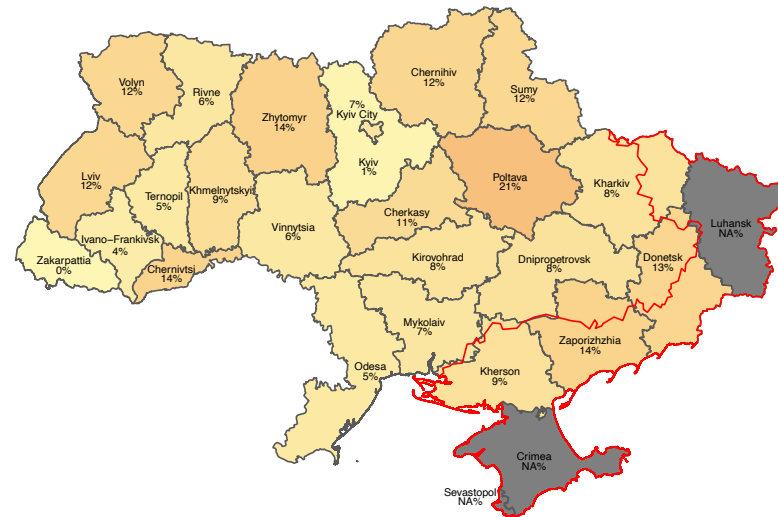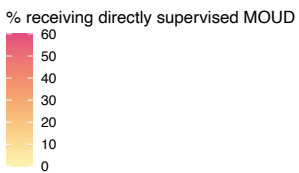

**Figure S1.** Proportion of patients in governmental clinics receiving daily directly supervised MOUD. Grey color represents occupied or annexed regions. In all plots, the red line shows the part of Ukraine that was occupied by Russian forces as of September 2, 2022. Outline of the occupied territory is approximate (source: Soar Earth <https://soar.earth/maps/13152>).
